1

2

3 Astrocyte-mediated transduction of muscle fiber contractions synchronizes hippocampal neuronal network  
4 development

5

6

7 Ki Yun Lee<sup>1</sup>, Justin S. Rhodes<sup>2, \*</sup>, and M. Taher A. Saif<sup>1, \*</sup>

8

9

10

11 <sup>1</sup> Department of Mechanical Science and Engineering, University of Illinois at Urbana-Champaign, Urbana, IL  
12 61801, USA

13

14 <sup>2</sup> Department of Psychology, Beckman Institute, University of Illinois at Urbana-Champaign, Urbana, IL 61801,  
15 USA

16

17

18 \* Corresponding authors

19 Email: [jrhodes@illinois.edu](mailto:jrhodes@illinois.edu) (JR), [saif@illinois.edu](mailto:saif@illinois.edu) (MS)

## 20 **Abstract**

21 Exercise supports brain health in part through enhancing hippocampal function. The leading hypothesis is that  
22 muscles release factors when they contract (e.g., lactate, myokines, growth factors) that enter circulation and  
23 reach the brain where they enhance plasticity (e.g., increase neurogenesis and synaptogenesis). However, it  
24 remains unknown how the muscle signals are transduced by the hippocampal cells to modulate network activity  
25 and synaptic development. Thus, we established an *in vitro* model in which the media from contracting primary  
26 muscle cells (CM) is applied to developing primary hippocampal cell cultures on a microelectrode array. We  
27 found that the hippocampal neuronal network matures more rapidly (as indicated by synapse development and  
28 synchronous neuronal activity) when exposed to CM than regular media (RM). This was accompanied by a  
29 fourfold increase in the proliferation of astrocytes. Further, experiments established that the astrocytes release  
30 factors that inhibit neuronal excitability and facilitate network development. Results provide new insight into  
31 how exercise may support hippocampal function through regulating astrocyte proliferation and subsequent  
32 taming of neuronal activity into an integrated network.

## 33 Introduction

34 Exercise is a highly effective strategy for maintaining cognitive health throughout life, even when initiated at  
35 late stages in life [1–3]. Many studies have shown robust long-term changes in the hippocampus from increased  
36 physical activity, such as increased adult hippocampal neurogenesis, synaptogenesis and enlarged hippocampal  
37 volume which likely support enhanced cognition [3–7]. However, the mechanisms by which exercise produces  
38 such dramatic changes in the hippocampus remain elusive. Uncovering the mechanisms that are responsible for  
39 enlarging the hippocampus and enhancing its function could be used to reverse-engineer treatments for  
40 cognitive pathologies that result in a diminished size and function of the hippocampus, such as Alzheimer’s  
41 disease, stress, depression, anxiety, PTSD, Cushing’s disease, epilepsy, and normal aging [8].

42 Cumulative research over the past few decades has suggested that factors released from contracting muscles  
43 (such as lactate [9], growth factors [10,11], trophic factors [12], and myokines [13,14]) provide crucial signals  
44 that support enhanced plasticity [15]. However, how muscle factors affect hippocampal cells is still being  
45 worked out. Recently, we found that repeated electrical contractions of the hindlimb muscles of anesthetized  
46 mice in a pattern that produced endurance adaptations in the muscles (40 reps, twice a week for 8 weeks) caused  
47 increased numbers of new astrocytes in the hippocampus and enlarged the volume of the dentate gyrus by  
48 approximately 10% [16]. This suggests astrocytes are sensitive to muscle factors and proliferate when they  
49 detect muscle factors in the blood. Given the role that astrocytes play in forming the blood-brain barrier, they  
50 are well situated to transduce signals from the blood into the brain.

51 One way to study the interactions between contracting muscle cells and hippocampal cells including neurons  
52 and astrocytes is to isolate the cells and perform experiments *in vitro*. For example, previous *in vitro* studies  
53 found that muscle conditioned media attracted neurites of spinal cord motor neurons to form neuro-muscular  
54 junctions [17]. Along this line, our lab has been examining cross-talk between muscles and neurons *in vitro*. We  
55 recently found that when media from contracting muscle fibers derived from a C2C12 mouse myoblast cell line  
56 is applied to neuronal cultures derived from a mouse embryonic stem cell line plated on a micro-electrode array,  
57 it enhanced overall neural firing rates of the neurons [18].

58 To further explore how factors from contracting muscles might influence hippocampal cells, we developed an *in*  
59 *vitro* preparation in which primary mouse skeletal muscle cells are plated on a functionalized substrate. The  
60 myoblasts develop bundles of myotubes and begin to contract spontaneously. We then take the media  
61 surrounding the contracting muscles (conditioned media, CM) and apply that media to *in vitro* primary  
62 hippocampal cell cultures that include neurons and astrocytes. The objectives of this study were to determine  
63 whether CM influences the function and maturation of hippocampal neuronal networks, and to investigate the

64 role of astrocytes in the process of transduction of muscle contractions to the activity of hippocampal neuronal  
65 networks *in vitro*.

## 66 **Materials and methods**

### 67 **Primary mouse skeletal muscle and hippocampus dissection**

68 Muscle tissues from the hindlimbs of 4-week-old CD1 mice were collected and dissociated using a standard  
69 protocol [19] with slight modifications. Briefly, the tissues were collected in cold DPBS (Corning), minced, and  
70 digested for 30 minutes in digestion media consisting of DMEM, 2.5% HEPES, 1% GlutaMAX (all from  
71 Gibco), and 1% Penicillin-Streptomycin (Lonza) with the addition of 400 unit/ml collagenase (Worthington)  
72 and 2.4 unit/ml dispase (Sigma). The remaining tissues were triturated by pipetting in 0.25% trypsin (Gibco),  
73 then filtered by 70 and 40  $\mu$ m cell strainers. After the dissociation, the pre-plating technique [20,21] was  
74 implemented to remove fibroblasts and increase the yield of myoblasts. The pre-plating technique steps are  
75 following. First, the dissociated cells were plated and incubated in uncoated flasks for three hours. Second, the  
76 supernatant with floating cells was collected and transferred into functionalized culture dishes.

77 For hippocampal dissection, hippocampal tissues were isolated from 2-day-old CD1 mouse pups and  
78 dissociated into single cells by following established protocol [22]. The dissected hippocampal tissues were  
79 collected in cold Hibernate-E (Gibco), minced, then digested twice in 2 mg/ml papain (Sigma) for 30 minutes.  
80 The remaining tissues were mechanically dissociated further by pipetting, then filtered by 70 and 40  $\mu$ m cell  
81 strainers.

82 All procedures were approved by the University of Illinois Institutional Animal Care and Use Committee and  
83 adhered to NIH guidelines (protocol number: 21053).

### 84 **Cell culture**

85 Culture dishes were coated with 0.1 mg/ml Matrigel (Corning) for preparations of cell culture. The primary  
86 skeletal myoblasts were maintained below 70~80% confluency in muscle growth media consisting of Ham's F-  
87 10 Nutrient Mix, 20% fetal bovine serum, 1% GlutaMAX, 1% MEM Non-Essential Amino Acids (all from  
88 Gibco), 1% Penicillin-Streptomycin, and 0.5% chick embryo extract (US Biological) with ice-cold 10 ng/ml  
89 bFGF, 20  $\mu$ M forskolin, and 100  $\mu$ M IBMX (all reagent from Sigma). Once the confluency reached 70~80%,  
90 then the culture was maintained in muscle differentiation media consisting of DMEM and Ham's F-12 Nutrient  
91 Mix at a volume ratio of 1:1, 10% horse serum, 1% GlutaMAX (all from Gibco), and 1% Penicillin-  
92 Streptomycin to initiate myotube formations. Once myotubes were matured and contractions were observed, the  
93 media was changed with pre-muscle conditioned media consisting of Advanced DMEM/F-12, 1% GlutaMAX  
94 (all from Gibco), and 1% Penicillin-Streptomycin.

95 For the hippocampal neuron culture, the preparation of cell culture is the same as muscle culture. Hippocampal  
96 neuron cells were cultured using specially formulated media by the lab such as RM, CM, astrocyte media

97 conditioned by RM (Ast-RM), and astrocyte media conditioned by CM (Ast-CM) depending on experiments  
98 (see details in Materials and methods).

## 99 Muscle anti-actomyosin and glia anti-mitotic treatments

100 To inhibit skeletal muscle contraction, the specific reagent was used as shown in previous studies [23,24]. In the  
101 fully differentiated muscle culture with spontaneous contraction, 10  $\mu$ M *N*-benzyl-*p*-toluene sulphonamide  
102 (BTS) (Sigma) was added. After 5-6 days, the BTS solution was replenished with the control media with 0  $\mu$ M  
103 BTS and tension recovery was monitored after the washout.

104 In the mechanistic study, the proliferation of glia was inhibited by the specific reagent using the standard  
105 protocol [25]. Briefly, culture was treated with a cocktail consisting of 20  $\mu$ M 5-fluorodeoxyuridine (MP  
106 Biomedicals), 20  $\mu$ M uridine, and 0.5  $\mu$ M Arabinofuranosyl Cytidine (all from Sigma) on day 1 and incubated  
107 for 72 hours. After 72 hours, 2/3 of the media was replenished with new media without the cocktail. A day after,  
108 the whole media was changed without the cocktail.

## 109 Collection of muscle and astrocyte conditioned media

110 For the collection of RM and CM, primary skeletal myoblasts were cultured in muscle growth media, then  
111 muscle differentiation media when the confluency reaches 70~80%. Once myotubes were matured and 10~20%  
112 of myotubes began to twitch autonomously which is about 4 days after, the culture was maintained in pre-  
113 muscle conditioned media. The pre-muscle conditioned media was collected using 0.22  $\mu$ m filters every 24  
114 hours for 8 days and stored at -80 °C. For control, pre-regular media was collected from a culture dish without  
115 muscle cells, treated, incubated, and stored the same way as the CM. The final forms of RM and CM consist of  
116 pre-regular and muscle conditioned media, respectively and Neurobasal medium at a volume ratio of 1:1, 10%  
117 KnockOut serum replacement, 1% GlutaMAX (all from Gibco), and 1% Penicillin-Streptomycin with ice-cold  
118 0.1 mM  $\beta$ -mercaptoethanol (Gibco), 10 ng/ml glial-derived neurotrophic factor (Neuromics), and 10 ng/ml  
119 ciliary neurotrophic factor (Sigma).

120 For the collection of Ast-RM and Ast-CM, primary hippocampal neurons and astrocytes were cultured in basal  
121 media consisting of Advanced DMEM/F-12 and Neurobasal medium at a volume ratio of 1:1 10% KnockOut  
122 serum replacement, 1% GlutaMAX, and 1% Penicillin-Streptomycin. Once the confluency reached 100%, the  
123 media was replenished with RM and CM for the collection of Ast-RM and Ast-CM, respectively. The media  
124 was collected using 0.22  $\mu$ m filters every 24 hours and stored at -80 °C.

## 125 Immunofluorescence

126 Immunocytochemistry was performed by following steps. Samples were fixed with 4% paraformaldehyde,  
127 permeabilized with 0.05% Triton-X for 15 minutes at room temperature, and blocked with buffer solution

128 consisting of DPBS, 5% goat serum (Sigma), and 1% bovine serum albumin (Sigma) overnight at 4 °C. The  
129 samples were treated with primary antibodies overnight at 4 °C, secondary antibodies for 2 hours, and DAPI  
130 (1:1000; Invitrogen, D1306) for 20 minutes at room temperature.

131 Primary antibodies were anti-synaptophysin monoclonal rabbit (1:1000; Abcam, ab32127), anti-PSD95  
132 monoclonal mouse (1:1000; Invitrogen, MA1-046), anti-Bassoon monoclonal mouse (1:1000; Abcam,  
133 ab82958), anti-β III Tubulin polyclonal rabbit (1:1000; SYSY, 302 302), anti-S100β monoclonal mouse  
134 (1:1000; SYSY, 287 011), and Alexa Fluor 647-conjugated Phalloidin (1:500; Invitrogen, A22287). Secondary  
135 antibodies were goat anti-chicken IgY Alexa Fluor 488 (ab150173), goat anti-mouse IgY Alexa Fluor 488  
136 (ab150117), goat anti-rabbit IgY Alexa Fluor 568 (ab175696), and goat anti-mouse IgY Alexa Fluor 647  
137 (ab150119) (all 1:500; Abcam).

138 All samples were imaged using Zeiss 710 Confocal microscope (Carl Zeiss Microscopy).

### 139 Synapse detection using double-fluorescent label method

140 To detect and measure synapses and filamentous actin at presynaptic terminals, the double-fluorescent label  
141 method was used by following protocol with modifications [26]. Briefly, synapses or F-actin were double-  
142 labeled with two different antibodies at different channels. One set of puncta from one channel and the other set  
143 from the other channel were colocalized, then verified as synapses. The total intensity of synapse and F-actin  
144 was measured from integrated image planes after the colocalization process. The analysis was performed by  
145 ImageJ.

### 146 Calcium Imaging

147 Calcium imaging was performed using Cal-590-AM (AAT Bioquest, 20510) by the manufacturer's protocols.  
148 Briefly, samples were incubated with DMEM, 0.04% Pluronic F-127 (Sigma), and 5 μM Cal-590-AM for an  
149 hour at 37°C. After washout, samples were supplemented with DMEM with no phenol red to reduce  
150 background noise. The dye-loaded cells were excited at 574 nm and imaging was performed at the frame rate of  
151 12 fps. For quantitative analysis, the average fluorescence intensity of selected regions of interest was  
152 calculated. Then the trace of fluorescent dynamics was calculated as  $\Delta F/F_0 = (F_n - F_0)/F_0$ , where where  $F_n$   
153 and  $F_0$  is the average intensity at  $n^{\text{th}}$  frame and at resting state, respectively.

### 154 MEA preparation

155 MEA measurements were performed using an MEA 2,100-Lite Amplifier (Multi Channel Systems MCS  
156 GmbH). The 6-well MEA device was fabricated from a manufacturer (Multi Channel Systems MCS GmbH),  
157 and it contained nine embedded 30 μm diameter TiN electrodes per well with 200 μm spacing between  
158 electrodes and six reference electrodes. The MEA device was coated with 0.1 mg/ml Poly-D-Lysine (Sigma)

159 and Matrigel for cell culture preparation. The cell seeding density for cultures in MEAs was 0.4-0.6 M/cm<sup>2</sup>.  
160 Measurements were performed at a sampling rate of 10 kHz for 5 min at 37 °C with a sealed cover to keep CO<sub>2</sub>  
161 concentration stable. Media was replenished every other day.

## 162 MEA recording, and spike/burst detection

163 Neuronal activity was analyzed by Multi-Channel Analyzer software (Multi Channel Systems MCS GmbH),  
164 Python (3.9.7), and MATLAB. Raw data were filtered using a 2nd order Butterworth high pass filter with 200  
165 Hz cutoff frequency. Action potentials were detected as spikes by a threshold of 4 × standard deviations for both  
166 rising and falling edge from the noise magnitude distribution. Spikes were only detected by active electrodes  
167 which were defined by electrodes containing at least 5 spikes/min. The parameters of burst detection are as  
168 follows: Maximum interval to start burst: 50 ms, maximum interval to end burst: 50 ms, minimum interval  
169 between bursts: 100 ms, minimum duration of burst: 50 ms, minimum number of spikes in burst: 4.

## 170 Synchrony index

171 The synchrony of spike trains between electrodes was assessed through cross-correlation for discrete functions  
172 [27]. There are total nine electrodes and spike train data for each electrode was cross-correlated with every other  
173 electrode. The synchrony index was achieved by averaging of 36 possible combinations. The cross-correlation  
174 was proceeded with zero lag. The synchrony index,  $\bar{\chi}$ , of nine electrodes is described as

$$175 \quad \bar{\chi} = \frac{1}{36} \sum_{p=1}^9 \sum_{q=p+1}^9 \frac{\sum(x_i^p \cdot y_i^q)}{\sqrt{\sum(x_i^p)^2 \cdot \sum(y_i^q)^2}}$$

176 where  $x$  and  $y$  are spike trains consisting of 0 (no spike) and 1 (spike),  $p$  and  $q$  are the  $p^{\text{th}}$  and  $q^{\text{th}}$  electrode, and  
177  $i$  is the  $i^{\text{th}}$  discrete time.  $\bar{\chi} = 0$  and  $\bar{\chi} = 1$  represent completely asynchronous and synchronous, respectively.

## 178 Statistical analysis

179 SAS (9.4) and R (4.0.3) were used for statistical analysis.  $p < 0.05$  was considered statistically significant. Data  
180 were considered normally distributed when the absolute value of the skewness and kurtosis was less than 1 and  
181 2, respectively. In the case of non-normal distribution, a power transform was used to transform data to meet the  
182 normality conditions. Actin intensity, muscle contraction amplitudes, calcium signal, and astrocyte number in  
183 response to the glia inhibitor were evaluated by two-sample t-test (RM vs. CM, control vs. BTS 10 μM, and  
184 control vs. glia inhibitor). Synapse number, vesicle accumulation, and astrocyte number were evaluated by two-  
185 way ANOVA with day (day 2 vs. day 9) and treatment (CM vs. RM) as factors. The MEA outcomes of the BTS  
186 study were analyzed using repeated measures three-way ANOVA with cohort as a blocking variable, day (day 2  
187 to 9) entered as a within-subjects, muscle treatment (2 levels: RM vs. CM) as a between-subjects factor, and  
188 drug (2 levels: control vs. BTS) entered as a between-subjects factor. Similarly, the MEA outcomes of the glia  
189 reduced study were analyzed using repeated measures three-way ANOVA with cohort as a blocking variable,



190 day (day 2 to 9) entered as a within-subjects, muscle treatment (2 levels: RM vs. CM) as a between-subjects  
191 factor, and astrocyte composition (3 levels: presence vs. absence vs. absence with astrocyte releasate (Ast-RM  
192 and Ast-CM)) as a between-subjects factor. For the burst rate (BTS and glia reduced study) and synchrony  
193 index (glia reduced study), aligned rank transform was used for the non-parametric test since data were  
194 considered non-normally distributed. Post-hoc pairwise differences between means were performed using  
195 Fisher's least significant difference test.

## 196 Results

### 197 Contracting muscle conditioned media enhances neuronal activity 198 measured by microelectrode arrays

199 Consistent with our previous MEA study with C2C12 mouse myoblast cell line and mouse embryonic stem cell-  
200 derived neuronal culture [18], CM from primary skeletal muscle cells increased spike and burst rates of primary  
201 hippocampal neurons across days (Fig 1A and 1B). The general pattern of development of spike trains over time  
202 in RM was consistent with other studies using primary hippocampal cells and primary sensory neurons at a  
203 similar cell seeding density [28,29]. Significant differences in spike rates were observed between days ( $F_{7, 80} =$   
204  $19.4, p < 0.001$ ) and between RM versus CM treatments ( $F_{1, 80} = 202.2, p < 0.001$ ). The interaction between day  
205 and treatment was also significant ( $F_{7, 80} = 23.7, p < 0.001$ ). Similar to spike rate, burst rate also showed  
206 significant effects of day ( $F_{7, 72} = 10.5, p < 0.001$ ), treatment ( $F_{1, 72} = 38.3, p < 0.001$ ), and interaction between  
207 the two ( $F_{7, 72} = 21.1, p < 0.001$ ). The interactions were caused by a different pattern of results for earlier time-  
208 points (days 2-7), as compared to later time-points (days 8 and 9). At the early time-points, CM had a higher  
209 spike and burst rates, but at later time-points the difference in them between RM and CM was reduced, absent,  
210 or reversed.

211 **Fig 1. Functional quantification of neuronal activity measured by an MEA.** (A) Normalized spike rate. (B)  
212 Normalized burst rate. (C) Synchrony Index. (D) Average muscle contraction amplitudes between control and  
213  $10 \mu\text{M}$  BTS (left). Skeletal muscle contraction patterns in the presence of 0 (top right) and  $10 \mu\text{M}$  BTS (bottom  
214 right). Scale bar in x, y: 1 s,  $1 \mu\text{m}$ . (E) Normalized peak fluorescent changes between control and  $10 \mu\text{M}$  BTS.  
215 Traces of calcium dynamics in the presence of 0 (top right) and  $10 \mu\text{M}$  BTS (bottom right). Scale bar in x, y: 2  
216 s,  $1 \Delta F/F_0$ . Data are represented as mean  $\pm$  SEM ( $n = 12$  (MEA outcomes of non-BTS group), 6 (BTS group),  
217 3 (muscle measurements)). Different lowercase letters indicate significant differences ( $p < 0.05$ ). (F) Raster plots  
218 representing spike trains from nine electrodes from RM (top left), RM with BTS (top right), CM (bottom left),  
219 and CM with BTS (bottom right) on day 9. Each line and the red box represent a single firing, and synchronous  
220 burst, respectively. Scale bar: 2 s.

221 Similar to spike rate and burst rate, CM also caused neurons to fire more synchronously as compared to RM  
222 (Fig 1C). A two-way ANOVA showed a significant effect of day ( $F_{7, 75} = 175.7, p < 0.001$ ), treatment ( $F_{1, 75} =$   
223  $4083.4, p < 0.001$ ) and the interaction between the two ( $F_{7, 75} = 231.1, p < 0.001$ ). However, unlike spike rate  
224 and burst rate which showed greater differences between CM and RM at initial time-points than later time-  
225 points, the synchrony index showed the reverse pattern, with greater differences at the later time-points and no  
226 difference at the early time-points when little synchronous firing occurred.

227 Having shown that CM increases spike rate, burst rate and synchronous firing of primary hippocampal neurons  
228 in culture, we next wanted to evaluate whether contraction of the muscles was necessary for the MEA effects.  
229 The alternative is that muscle cells release neuro-active factors regardless of whether they are contracting.  
230 Hence, we repeated the experiment except we treated the muscle cells with a contraction inhibitor before  
231 collecting the media. We used a known skeletal muscle myosin II inhibitor, N-benzyl-p-toluene sulphonamide  
232 (BTS). BTS weakens myosin's interaction with F-actin and *ex vivo* studies found 10  $\mu\text{M}$  of BTS suppresses  
233 force production by 60% [23,24]. Consistent with these results, the amplitudes of muscle contraction were  
234 reduced by 69% with BTS *in vitro* ( $t_4 = 20.7$ ,  $p < 0.001$ ; Fig 1D). Moreover, we performed calcium imaging of  
235 the skeletal muscles *in vitro* (see details in Materials and methods). Calcium dynamics in muscle cultures show  
236 a 73% reduction between control and 10  $\mu\text{M}$  of BTS ( $t_4 = 4.9$ ,  $p = 0.0083$ ; Fig 1E). Widefield (S1 and S2 videos)  
237 and calcium imaging (S3 and S4 videos) of skeletal muscles are available as supplementary materials.

238 BTS prevented CM from increasing spike and burst rate, but had no effect on baseline spike and burst rate in  
239 RM. This suggests muscle cell contractions are required for CM to increase spike and burst rate. For spike and  
240 burst rate, all factors in the repeated measures ANOVA were significant including day ( $F_{7, 212} = 50.2$ ,  $p < 0.001$ ;  
241  $F_{7, 187} = 24.3$ ,  $p < 0.001$ ), muscle treatment (RM vs. CM) ( $F_{1, 31} = 194.0$ ,  $p < 0.001$ ;  $F_{1, 21} = 48.8$ ,  $p < 0.001$ ), BTS  
242 treatment ( $F_{1, 31} = 101.2$ ,  $p < 0.001$ ;  $F_{1, 21} = 52.8$ ,  $p < 0.001$ ) and all interactions (all  $p < 0.001$ ). Post-hoc  
243 comparisons showed no difference between RM and RM with BTS ( $p = 0.4516$ ;  $p = 0.1607$ ), whereas CM  
244 produced greater spike and burst rates as compared to CM with BTS ( $p < 0.001$ ,  $p < 0.001$ ). Finally, CM with  
245 BTS was not different from RM ( $p = 0.1272$ ,  $p = 0.9548$ ) or RM with BTS ( $p = 0.4553$ ;  $p = 0.1643$ ).

246 While BTS specifically reduced spike and burst rate in CM with no effect on RM, we observed a different result  
247 for the synchrony index. BTS completely obliterated the synchrony index when added to either RM or CM  
248 treatments. This was supported by a significant effect of day, muscle treatment, BTS treatment and all  
249 interactions in the overall repeated measures ANOVA. Post-hoc tests showed that BTS-RM and BTS-CM  
250 displayed near zero synchrony across the entire period. The synchrony indices in BTS-RM and BTS-CM groups  
251 were significantly lower than RM ( $p < 0.001$ ,  $p < 0.001$ ) and CM without BTS ( $p < 0.001$ ,  $p < 0.001$ ) collapsed  
252 across days. Taken together, this suggests BTS has a direct effect on the cell culture preventing synchrony and  
253 hence we cannot draw strong conclusions about whether contraction of muscles is required for increasing the  
254 synchrony index without further experimentation.

255

## 256 Contracting muscle conditioned media promotes synaptogenesis

257 Primary hippocampal cells plated in culture form synapses over a period of days. Increased number or strength  
258 of synapses could explain the increased synchrony index in CM compared to RM. To quantify synaptic  
259 development in response to CM versus RM, we performed immunocytochemistry to count the number of  
260 synapses using co-localization of pre- and post-synaptic markers (see details in Materials and methods) on days  
261 2 and 9 for CM and RM [26].

262 The results showed that CM expedites synaptic development compared to RM. This was supported by a  
263 significant effect of day ( $F_{1,20} = 19.6$ ,  $p < 0.001$ ), no main effect of treatment (RM vs. CM) ( $F_{1,20} = 0.77$ ,  
264  $p = 0.3896$ ), but a significant interaction between day and treatment ( $F_{1,20} = 8.5$ ,  $p = 0.0087$ ; Fig. 2A). Post-hoc  
265 tests indicated a significant increase in the synapse number from day 2 to 9 in RM ( $p < 0.001$ ), but not in CM ( $p$   
266  $= 0.2953$ ). On day 2, the synapse number in CM was significantly higher by 44 % compared to RM ( $p =$   
267  $0.0145$ ), but on day 9, no differences between CM and RM were detected ( $p = 0.1669$ ). The confocal images of  
268 post-synapses, synaptic vesicles, and colocalization are shown in supplementary materials (S1 Fig).

269 **Fig 2. Morphological quantification of synaptogenesis, synaptic vesicle accumulation, filamentous actin**  
270 **intensity, and astrogenesis.** (A) Temporal change in synapse numbers between RM and CM on day 2 and 9.  
271 (B) Normalized vesicle accumulation per synapse between RM and CM on day 2 and 9. (C) Normalized F-actin  
272 intensity on day 9. (D) Temporal change in astrocyte numbers between RM and CM on day 2 and 9. (E)  
273 Confocal images of astrocytes in the cultures on day 2 in RM (left) and CM (right) (S100 $\beta$ , green; DAPI, blue).  
274 Scale bar: 50  $\mu$ m. Data are represented as mean  $\pm$  SEM ( $n = 6$ ). Different lowercase letters indicate significant  
275 differences ( $p < 0.05$ ).

276 **Contracting muscle conditioned media accrues filamentous actin at**  
277 **presynaptic terminals but does not significantly affect vesicle clustering**  
278 Functional synapses display an accumulation of vesicles and filamentous actin at the terminals [30]. F-actin  
279 plays a critical role in clustering and transporting vesicles within the synapse [31–34]. Hence, we wanted to  
280 determine whether CM affected vesicle accumulation and filamentous actin concentration at the synapse as a  
281 potential mechanism for the increased synchrony observed in CM.

282 Following established methods [26] to quantify neurotransmitter vesicle clustering at the synapse, we measured  
283 average intensity of synaptophysin, a transmembrane protein for vesicles, co-localized with Bassoon,  
284 presynaptic nerve terminal marker. Results indicated vesicle clustering occurred at a similar rate in CM and  
285 RM. The ANOVA indicated a significant effect of day ( $F_{1,20} = 7.6$ ,  $p = 0.0121$ ), but no main effect of treatment  
286 ( $F_{1,20} = 1.1$ ,  $p = 0.2990$ ) or interaction ( $F_{1,20} = 0.79$ ,  $p = 0.3844$ ; Fig 2B). On day 2, F-actin was not detected in  
287 either CM or RM so results are not shown. However, filamentous actin was detected on day 9 in both groups,  
288 and average F-actin intensity in CM was higher by 48% ( $t_{10} = 2.9$ ,  $p = 0.0152$ ; Fig 2C).

289 **Muscle conditioned media from contracting muscles induces astrocyte**  
290 **proliferation**

291 The numbers of astrocytes significantly increased by tenfold from day 2 to day 9 collapsed across RM and CM.  
292 CM consistently displayed fourfold greater numbers of astrocytes than RM on both days (Fig. 2D). This was  
293 reflected by a significant effect of day ( $F_{1,20} = 145.0$ ,  $p < 0.001$ ) and treatment ( $F_{1,20} = 49.1$ ,  $p < 0.001$ ) but no  
294 interaction ( $F_{1,20} = 0.93$ ,  $p = 0.3466$ ). This suggests CM massively increases the proliferation of hippocampal  
295 astrocytes similar to the effect observed *in vivo* [16].

296

## 297 **Astrocytes regulate neuronal activity *in vitro***

298 To determine the role of astrocytes in the increased spike rate observed in hippocampal primary cultures  
299 exposed to CM versus RM, we repeated the experiment in cultures with reduced astrocyte populations. To  
300 remove astrocytes from the primary hippocampal cell culture, we applied a glia inhibitor following established  
301 protocols [25] (see details in Materials and methods). Consistent with previous accounts, this resulted in an 81%  
302 reduction in the number of astrocytes in the culture ( $t_{14} = 5.70$ ,  $p < 0.001$ ) (Fig 3A). Confocal images of  
303 astrocyte populations in control and astrocyte reduced culture are shown (Fig 3B).

304 **Fig 3. A role of astrocytes as a regulator of neuronal activity.** (A) Result of glia anti-mitotic treatment ( $n =$   
305 8). (B) Confocal images of the control and glia reduced culture. Scale bar: 100  $\mu\text{m}$ . (C) Normalized spike rate in  
306 the presence and absence of astrocytes. Data are represented as mean  $\pm$  SEM ( $n = 18$  (unaltered group), 6 (glia  
307 reduced group)). Different lowercase letters indicate significant differences ( $p < 0.05$ ). Results for burst rate and  
308 synchrony index are shown in supplementary materials (S3 Fig and S1 appendix).

309 MEA data were collected from normal hippocampal cultures in RM and CM as reference controls, as well as  
310 from cultures with reduced astrocytes in RM, CM, Ast-RM, and Ast-CM (see Materials and Methods section on  
311 “Collection of muscle and astrocyte media”). In the repeated measures analysis of mean spike rate, all main  
312 effects of muscle conditioned media (RM vs CM) ( $F_{1, 53} = 254.8$ ,  $p < 0.001$ ), presence or absence of astrocytes  
313 ( $F_{2, 53} = 170.6$ ,  $p < 0.001$ ), and day ( $F_{7, 364} = 131.7$ ,  $p < 0.001$ ) were significant, and all possible interactions  
314 between these factors were also significant ( $p < 0.001$ ). The presence or absence of astrocytes factor includes 3  
315 levels, presence, absence, and absence but with the releasate from astrocytes added back in (Ast-RM and Ast-  
316 CM groups; see statistical methods). Post-hoc tests indicated that CM increased spike rate relative to RM in  
317 normal hippocampal cultures consistent with the previous result ( $p < 0.001$ ), but also in cultures with reduced  
318 astrocytes ( $p < 0.001$ ). To our surprise, we found that a reduction of astrocytes increased spike rate in both RM  
319 and CM ( $p < 0.001$ ), and the increase in CM with reduced astrocytes was an order of magnitude higher  
320 compared to the unaltered culture in CM (Fig 3C). Moreover, the increase in spike rate in CM relative to RM  
321 was greater for cultures with reduced astrocytes as compared to unaltered cultures as reflected by the significant  
322 interaction between muscle media and presence/absence of astrocytes ( $F_{2, 53} = 49.8$ ,  $p < 0.001$ ). Taken together,  
323 these results suggest astrocytes inhibit neuronal activity and CM increases their inhibitory function to counteract  
324 the excitatory effect of CM on neuronal activity.

325 To determine whether astrocytes mediate their inhibitory function through releasing factors into the media or  
326 whether they need to be physically present to exert their inhibitory effect, we included the Ast-RM and Ast-CM  
327 treatments. In these treatments, astrocytes were removed from the hippocampal culture but media from intact  
328 hippocampal cultures with astrocytes was added back in after being exposed to either RM or CM. RM and Ast-  
329 CM reduced spike rate relative to RM and CM when the hippocampal cultures were deprived of astrocytes.

330 Moreover, the spike rate in the Ast- groups was similar to when the astrocytes are physically present in intact  
331 primary hippocampal cultures. This is supported by non-significant post-hoc test between groups where  
332 astrocytes were physically present versus absent but releasate added back in ( $p = 0.0537$ ). Further, comparisons  
333 between normal cultures exposed to CM and astrocyte-deprived cultures exposed to Ast-CM showed no  
334 significant difference ( $p = 0.9597$ ). Likewise, normal cultures exposed to RM showed no difference from  
335 astrocyte deprived cultures with Ast-RM ( $p = 0.68$ ). These results suggest that astrocytes mediate their  
336 inhibitory effect through releasing factors into the media and do not need to be physically present in the culture  
337 to exert their influence.

338



## Discussion

339 Here we establish for the first time an *in vitro* platform to explore interactions between contracting primary  
340 muscle cells and primary hippocampal cells. One of the leading hypothesized mechanisms for pro-cognitive  
341 effects of exercise is that muscle contractions release factors that cross into the brain where they directly  
342 influence hippocampal cells involved in cognition [7,10,14]. This hypothesis is supported by our recent  
343 discovery that muscle contractions alone, through electrical stimulation of the sciatic nerve in anesthetized  
344 mice, are capable of increasing the generation of new astrocytes in the hippocampus and increasing the volume  
345 of the dentate gyrus [16]. The *in vitro* model developed herein adds to this literature by identifying a novel  
346 mechanism by which muscle cells may communicate with hippocampal cells. Muscle cells release factors that  
347 cause hippocampal neurons to become excited and hippocampal astrocytes to proliferate faster. The expanded  
348 astrocytes play a role in regulating neuronal excitability. Together this leads to a network that has overall  
349 greater excitability than in absence of the muscle signals, but also greater inhibition from astrocytes. The  
350 astrocytes thus tame the increased electrical activation of the circuit from the muscle factors in a way that leads  
351 to selective strengthening of coordinated activation patterns between neurons.  
352

353 A key finding was that muscle contractions are necessary for CM to influence spike rate and burst rate in the  
354 hippocampal cultures. When muscles were prevented from contracting by administering BTS, CM no longer  
355 produced the increased effects on spike and burst rate (Fig 1A and 1B). This adds important validity to the  
356 model since exercise involves mechanical forces and the hypothesis is that muscle contractions release factors  
357 that they otherwise would not release to communicate their status of engaging in physical activity to the  
358 hippocampus. We were able to make this conclusion because the effect of BTS on spike and burst rate was  
359 specific to CM, it had no impact when administered in RM, (i.e., BTS-RM spike and burst rate was similar to  
360 RM, but BTS-CM showed reduced spike and burst rate relative to CM). However, this was not true for the  
361 synchrony index where BTS appeared to directly eliminate synchronous firing of neurons whether in RM or  
362 CM (Fig 1C). Thus, we cannot be certain that the muscle contractions are necessary for the effect of CM on  
363 enhancing synchronous firing of action potentials. A method is needed that can prevent the muscle cells from  
364 contracting that does not directly interfere with any of the MEA outcomes.

365 In the context of whole organismal exercise, muscles communicate with hippocampal neurons while  
366 hippocampal neurons are involved in the sensorimotor processing in the brain that occurs during physical  
367 activity [15,35]. Indeed, acute activation of the hippocampus is strongly correlated with running speed and  
368 repeated exercise training increases adult hippocampal neurogenesis and astroglialogenesis [3,5–7]. Together with  
369 the *in vitro* data collected herein, the results suggest that muscle contractions contribute to the plasticity in the  
370 hippocampus by responding with signals that increase the number of new astrocytes to counterbalance the  
371 excitation that is likely intrinsic to the hippocampus involved in the sensorimotor response to physical activity.

372 Possibly related to the excitation of the hippocampus, whole organismal exercise produces a microenvironment  
373 in the hippocampus that is conducive for neurogenesis and synaptogenesis. Consistent with recent reports,  
374 results from the present study suggest that signals from muscle contractions likely contribute to the  
375 synaptogenic microenvironment. The fact that CM increased maturation of the hippocampal network and  
376 increased the formation of mature synapses is consistent with such a role.

377 It is notable that while CM greatly increased astrogliogenesis, it did not increase neurogenesis in the primary  
378 hippocampal cultures. This could be because the stem cell environment was disrupted during the *in vitro*  
379 preparation. On the other hand, the lack of an increase in neurogenesis is consistent with the *in vivo* study in  
380 which the contribution of muscle contractions was isolated. As mentioned earlier, this study found that repeated  
381 electrical contractions of muscles while the animal is anesthetized are capable of increasing astrogliogenesis but  
382 not neurogenesis in the hippocampus [16]. Taken together, these results strongly suggest that additional factors  
383 besides the muscle release are necessary to increase neurogenesis. This does not rule out the possibility that  
384 increased astrocytes and a microenvironment conducive for synaptogenesis may represent support systems  
385 signaled by the muscles in anticipation of neurogenesis which usually accompanies whole organismal exercise.

386 Increased astrocytes could be key to how CM increases synaptogenesis and inhibits neuronal excitability.  
387 Astrocytes are well-known homeostatic regulators of neuronal activity. They directly modulate the ratio of  
388 excitatory and inhibitory synapses and neurotransmitter concentrations such as GABA and glutamate based on  
389 environmental needs. An *in vitro* study found the appearance of GABAergic and glutamatergic synapses by 24  
390 hours when embryonic rat ventral spinal neurons were cultured on astrocytes as compared to 4 and 7 days,  
391 respectively in the neuron-only culture [36]. Furthermore, when astrocyte-conditioned media was supplemented  
392 in astrocyte-deprived situations, increases in GABAergic synapses, axon length [37], and receptors [38] were  
393 detected. Thus, astrocytes appear to release factors that increase GABAergic synapses and do not need to be  
394 physically adjacent to neurons to exert their inhibitory influence. This is consistent with their role in our study  
395 where media from neuronal cultures with astrocytes was capable of recapitulating the inhibitory effect of  
396 astrocytes in a neuronal culture without astrocytes physically present (Fig 3C). It is well established that  
397 astrocytes and astrocyte proliferation occur in response to epilepsy, and the evidence suggests astrocytes release  
398 factors such as gliotransmitters and tumor necrosis factor-alpha (TNF- $\alpha$ ) that inhibit neuronal excitability and  
399 are protective against excitotoxicity [39].

400 In addition to increasing the inhibitory function of astrocytes, CM also increased the maturation of the  
401 hippocampal network as reflected in the MEA data and the maturation of synapses. In this study, we used  
402 vesicle clustering and F-actin accumulation to quantify mature synapses. The presence of F-actin and vesicles at  
403 the terminal of presynaptic neurons is considered an indicator of a mature synapse. Previous *in vitro* studies  
404 have used the synaptic vesicle proteins, synapsin I and synaptophysin as markers to track the distribution of

405 synaptic vesicles during the development of primary hippocampal neuron cultures. The synaptic vesicles change  
406 their distribution from being mostly in cell bodies to mostly at synapses as the hippocampal network matures. F-  
407 actin is known to be concentrated at presynaptic terminals to support the vesicles [32–34] and to mediate their  
408 transportation [31]. Our observation that F-actin is concentrated more at presynaptic terminals in CM than RM  
409 implies that CM enhances the maturation of functional synapses with greater capacities to transport vesicles  
410 upon action potentials. This could explain why neuronal cultures plated on MEA exposed to CM displayed  
411 greater levels of synchronized firings of action potentials than RM because there were more mature synapses.

412 The increased number of astrocytes in the neuronal cultures exposed to CM may have contributed to the  
413 increased maturation of the hippocampal network by strengthening specific synapses and weakening others by  
414 pruning and inhibition. Mature synapses appeared earlier and were pruned earlier in cultures with more  
415 astrocytes as a consequence of exposure to CM. Whereas synapses continued to increase from day 2 to day 9 in  
416 RM, in CM they reached their peak around day 2 and were already in decline by day 9. Astrocyte-secreted  
417 proteins such as thrombospondins [40], hevin, and SPARC [41] may have promoted synaptogenesis. Astrocytes  
418 can directly eliminate synapses through MEGF10 and MERTK pathways which are two phagocytic receptors  
419 detecting signals from silent synapses [42,43].

420 The *in vitro* model is only useful to the extent that it reflects features of the whole-organismal phenomenon.  
421 Whole organismal exercise increases synaptogenesis and astroglialogenesis in the hippocampus and the *in vitro*  
422 model displays these features. It is not intended to represent the entirety of exercise’s impact on the  
423 hippocampus. For example, increased excitability (spike rate, burst rate, synchrony index) of the primary  
424 hippocampal network as measured by the MEA has no direct meaning for how neurons behave in the actual  
425 hippocampus during exercise. There is no “appropriate” level of excitability, and higher or lower excitability is  
426 not any “better” than the other as there is no benchmark for successful performance in a dish. The value of the  
427 reduced approach is thus not for recapitulating the patterns of neuronal activity and circuit dynamics, but rather  
428 to isolate the effect of muscle factors on basic properties of hippocampal cells.

429 Before conducting the present studies, we knew astrocytes increased in the hippocampus in response to  
430 exercise, and that muscle contraction alone was capable of recapitulating this effect. We observed the same  
431 phenomenon of increased astrocytes in the *in vitro* model, which justifies its use for exploring the role of  
432 increased astrocytes in the hippocampal response to muscle contractions. Because of the *in vitro* model, we now  
433 have a hypothesis for why astrocytes are responsive to muscle factors, they play an inhibitory role in taming the  
434 excitability of neurons that occurs in parallel with muscle contractions.

435 Future studies will build on the *in vitro* platform to explore potential reciprocal communication between muscle  
436 cells and hippocampal cells through a co-culture with shared media exchange. We are also interested in using

437 the platform to explore the potential mechanism by which CM causes astrocytes to proliferate and hippocampal  
438 networks to mature faster. Finally, we are interested in identifying the bio-active factors released from the  
439 contracting muscles that influence the hippocampal cultures. In the future, such information could be used to  
440 reverse engineer treatments to recapitulate pro-cognitive effects of exercise in the absence of physical activity.

441

## 442 **Acknowledgements**

443 We are grateful to Dr. Gelson Pagan-Diaz of the University of Texas for discussions of MEA, Jennie Gardner  
444 for general husbandry of animal subjects at the early stage of the study, Md Saddam Hossain Joy for discussions  
445 of the double-fluorescent label method, and Carlos Renteria for discussions of calcium imaging and MATLAB  
446 code. Lastly, we appreciate Dr. Onur Aydin of the University of Illinois for ideations and insightful discussions  
447 of the study.

448

## 449 References

- 450 1. Churchill JD, Galvez R, Colcombe S, Swain RA, Kramer AF, Greenough WT. Exercise, experience and  
451 the aging brain. *Neurobiology of Aging*. 2002;23(5).
- 452 2. Erickson KI, Kramer AF. Aerobic exercise effects on cognitive and neural plasticity in older adults. Vol.  
453 43, *British Journal of Sports Medicine*. 2009.
- 454 3. Erickson KI, Voss MW, Prakash RS, Basak C, Szabo A, Chaddock L, et al. Exercise training increases  
455 size of hippocampus and improves memory. *Proceedings of the National Academy of Sciences of the*  
456 *United States of America*. 2011;108(7).
- 457 4. Clark PJ, Kohman RA, Miller DS, Bhattacharya TK, Brzezinska WJ, Rhodes JS. Genetic influences on  
458 exercise-induced adult hippocampal neurogenesis across 12 divergent mouse strains. *Genes, Brain and*  
459 *Behavior*. 2011;10(3).
- 460 5. Clark PJ, Brzezinska WJ, Puchalski EK, Krone DA, Rhodes JS. Functional analysis of neurovascular  
461 adaptations to exercise in the dentate gyrus of young adult mice associated with cognitive gain.  
462 *Hippocampus*. 2009;19(10).
- 463 6. Redila VA, Christie BR. Exercise-induced changes in dendritic structure and complexity in the adult  
464 hippocampal dentate gyrus. *Neuroscience*. 2006;137(4).
- 465 7. van Praag H, Kempermann G, Gage FH. Running increases cell proliferation and neurogenesis in the  
466 adult mouse dentate gyrus. *Nature Neuroscience*. 1999;2(3).
- 467 8. Dhikav V, Anand KS. Is hippocampal atrophy a future drug target? *Medical Hypotheses*. 2007;68(6).
- 468 9. el Hayek L, Khalifeh M, Zibara V, Abi Assaad R, Emmanuel N, Karnib N, et al. Lactate mediates the  
469 effects of exercise on learning and memory through sirt1-dependent activation of hippocampal brain-  
470 derived neurotrophic factor (BDNF). *Journal of Neuroscience*. 2019;39(13).
- 471 10. Trejo JL, Carro E, Torres-Alemán I. Circulating insulin-like growth factor I mediates exercise-induced  
472 increases in the number of new neurons in the adult hippocampus. *Journal of Neuroscience*. 2001;21(5).
- 473 11. Fabel K, Fabel K, Tam B, Kaufer D, Baiker A, Simmons N, et al. VEGF is necessary for exercise-  
474 induced adult hippocampal neurogenesis. *European Journal of Neuroscience*. 2003;18(10).
- 475 12. Church DD, Hoffman JR, Mangine GT, Jajtner AR, Townsend JR, Beyer KS, et al. Comparison of high-  
476 intensity vs. high-volume resistance training on the BDNF response to exercise. *Journal of Applied*  
477 *Physiology*. 2016;121(1).
- 478 13. Moon HY, Becke A, Berron D, Becker B, Sah N, Benoni G, et al. Running-Induced Systemic Cathepsin  
479 B Secretion Is Associated with Memory Function. *Cell Metabolism*. 2016;24(2).
- 480 14. Wrann CD, White JP, Salogiannis J, Laznik-Bogoslavski D, Wu J, Ma D, et al. Exercise induces  
481 hippocampal BDNF through a PGC-1 $\alpha$ /FND5 pathway. *Cell Metabolism*. 2013;18(5).
- 482 15. Delezie J, Handschin C. Endocrine crosstalk between Skeletal muscle and the brain. Vol. 9, *Frontiers in*  
483 *Neurology*. 2018.
- 484 16. Gardner JC, Dvoretzkiy S v., Yang Y, Venkataraman S, Lange DA, Li S, et al. Electrically stimulated  
485 hind limb muscle contractions increase adult hippocampal astroglialogenesis but not neurogenesis or  
486 behavioral performance in male C57BL/6J mice. *Scientific Reports*. 2020;10(1).
- 487 17. McCaig CD. Myoblasts and myoblast-conditioned medium attract the earliest spinal neurites from frog  
488 embryos. *The Journal of Physiology*. 1986;375(1).
- 489 18. Aydin O, Passaro AP, Elhebeary M, Pagan-Diaz GJ, Fan A, Nuethong S, et al. Development of 3D  
490 neuromuscular bioactuators. *APL Bioengineering*. 2020 Mar 1;4(1).
- 491 19. Wang C, Yue F, Kuang S. Muscle Histology Characterization Using H&E Staining and Muscle  
492 Fiber Type Classification Using Immunofluorescence Staining. *BIO-PROTOCOL*. 2017;7(10).
- 493 20. Rando TA, Blau HM. Primary mouse myoblast purification, characterization, and transplantation for  
494 cell-mediated gene therapy. *Journal of Cell Biology*. 1994;125(6).
- 495 21. Qu Z, Balkir L, van Deutekom JCT, Robbins PD, Pruchnic R, Huard J. Development of approaches to  
496 improve cell survival in myoblast transfer therapy. *Journal of Cell Biology*. 1998;142(5).
- 497 22. Seibenhener ML, Wooten MW. Isolation and culture of hippocampal neurons from prenatal mice.  
498 *Journal of visualized experiments : JoVE*. 2012;(65).

- 499 23. Pinniger GJ, Bruton JD, Westerblad H, Ranatunga KW. Effects of a myosin-II inhibitor (N-benzyl-p-  
500 toluene sulphonamide, BTS) on contractile characteristics of intact fast-twitch mammalian muscle fibres.  
501 *Journal of Muscle Research and Cell Motility*. 2005;26(2).
- 502 24. Cheung A, Dantzig JA, Hollingworth S, Baylor SM, Goldman YE, Mitchinson TJ, et al. A small-  
503 molecule inhibitor of skeletal muscle myosin II. *Nature Cell Biology*. 2002;4(1).
- 504 25. Liu R, Lin G, Xu H. An Efficient Method for Dorsal Root Ganglia Neurons Purification with a One-  
505 Time Anti-Mitotic Reagent Treatment. *PLoS ONE*. 2013;8(4).
- 506 26. Dzyubenko E, Rozenberg A, Hermann DM, Faissner A. Colocalization of synapse marker proteins  
507 evaluated by STED-microscopy reveals patterns of neuronal synapse distribution in vitro. *Journal of*  
508 *Neuroscience Methods*. 2016;273.
- 509 27. Pagan-Diaz GJ, Drnevich J, Ramos-Cruz KP, Sam R, Sengupta P, Bashir R. Modulating  
510 electrophysiology of motor neural networks via optogenetic stimulation during neurogenesis and  
511 synaptogenesis. *Scientific Reports*. 2020;10(1).
- 512 28. Biffi E, Regalia G, Menegon A, Ferrigno G, Pedrocchi A. The influence of neuronal density and  
513 maturation on network activity of hippocampal cell cultures: A methodological study. *PLoS ONE*.  
514 2013;8(12).
- 515 29. Black BJ, Atmaramani R, Kumaraju R, Plagens S, Romero-Ortega M, Dussor G, et al. Adult mouse  
516 sensory neurons on microelectrode arrays exhibit increased spontaneous and stimulus-evoked activity in  
517 the presence of interleukin-6. *Journal of Neurophysiology*. 2018;120(3).
- 518 30. Fletcher TL, Cameron P, de Camilli P, Banker G. The distribution of synapsin I and synaptophysin in  
519 hippocampal neurons developing in culture. *Journal of Neuroscience*. 1991;11(6).
- 520 31. Kim CH, Lisman JE. A role of actin filament in synaptic transmission and long-term potentiation.  
521 *Journal of Neuroscience*. 1999;19(11).
- 522 32. Pechstein A, Shupliakov O. Taking a back seat: Synaptic vesicle clustering in presynaptic terminals.  
523 *Frontiers in Synaptic Neuroscience*. 2010.
- 524 33. Peng A, Rotman Z, Deng PY, Klyachko VA. Differential Motion Dynamics of Synaptic Vesicles  
525 Undergoing Spontaneous and Activity-Evoked Endocytosis. *Neuron*. 2012;73(6).
- 526 34. Pieribone VA, Shupliakov O, Brodin L, Hilfiker-Rothenfluh S, Czernik AJ, Greengard P. Distinct pools  
527 of synaptic vesicles in neurotransmitter release. *Nature*. 1995;375(6531).
- 528 35. Saraulli D, Costanzi M, Mastroianni V, Farioli-Vecchioli S. The Long Run: Neuroprotective Effects of  
529 Physical Exercise on Adult Neurogenesis from Youth to Old Age. *Current Neuropharmacology*.  
530 2017;15(4).
- 531 36. Li YX, Schaffner AE, Barker JL. Astrocytes regulate the developmental appearance of GABAergic and  
532 glutamatergic postsynaptic currents in cultured embryonic rat spinal neurons. *European Journal of*  
533 *Neuroscience*. 1999;11(7).
- 534 37. Hughes EG, Elmariam SB, Balice-Gordon RJ. Astrocyte secreted proteins selectively increase  
535 hippocampal GABAergic axon length, branching, and synaptogenesis. *Molecular and Cellular*  
536 *Neuroscience*. 2010;43(1).
- 537 38. Diniz LP, Tortelli V, Garcia MN, Araújo APB, Melo HM, Seixas da Silva GS, et al. Astrocyte  
538 transforming growth factor beta 1 promotes inhibitory synapse formation via CaM kinase II signaling.  
539 *GLIA*. 2014;62(12).
- 540 39. Verhoog QP, Holtman L, Aronica E, van Vliet EA. Astrocytes as Guardians of Neuronal Excitability:  
541 Mechanisms Underlying Epileptogenesis. Vol. 11, *Frontiers in Neurology*. 2020.
- 542 40. Christopherson KS, Ullian EM, Stokes CCA, Mallowney CE, Hell JW, Agah A, et al. Thrombospondins  
543 are astrocyte-secreted proteins that promote CNS synaptogenesis. *Cell*. 2005;120(3).
- 544 41. Kucukdereli H, Allen NJ, Lee AT, Feng A, Ozlu MI, Conatser LM, et al. Control of excitatory CNS  
545 synaptogenesis by astrocyte-secreted proteins hevin and SPARC. *Proceedings of the National Academy*  
546 *of Sciences of the United States of America*. 2011;108(32).
- 547 42. Chung WS, Allen NJ, Eroglu C. Astrocytes control synapse formation, function, and elimination. *Cold*  
548 *Spring Harbor Perspectives in Biology*. 2015;7(9).
- 549 43. Chung WS, Clarke LE, Wang GX, Stafford BK, Sher A, Chakraborty C, et al. Astrocytes mediate  
550 synapse elimination through MEGF10 and MERTK pathways. *Nature*. 2013;504(7480).

551

552



## 553 **Supporting information captions**

554 **S1 Fig. Confocal images of synapses.** Post-synapses (PSD95) (top) and synaptic vesicle protein  
555 (synaptophysin) (bottom) in (A) RM and (B) CM. Orthogonal views of the colocalized channels in (C) RM and  
556 (D) CM. Synapses are indicated by the arrowhead. DIV 2. Scale bar: 50  $\mu\text{m}$ .

557 **S2 Fig. Primary skeletal muscle contraction *in vitro*.** (A) Myotube with cross-striations indicated by the  
558 arrowhead ( $\alpha$ -actinin, green; DAPI, blue). Scale bar: 10  $\mu\text{m}$ . (B) Contracting myotube indicated by the  
559 arrowhead (left). DIV 6. Scale bar: 100  $\mu\text{m}$ . Contraction pattern of the corresponding muscle fiber (right). Scale  
560 bar in x, y: 1 s, 1  $\mu\text{m}$ . (C) Lactate level between RM and CM measured by a colorimetric assay. Data are  
561 represented as mean  $\pm$  SEM (n = 3 (RM), 6 (CM)). Different lowercase letters indicate significant differences (p  
562 < 0.05).

563 **S3 Fig. Regulation of neuronal activity by astrocytes on MEA.** (A) Normalized burst rate. (B) Synchrony  
564 index in the presence and absence of astrocytes. Data are represented as mean  $\pm$  SEM (n = 18 (unaltered group),  
565 6 (glia reduced group)). Different lowercase letters indicate significant differences (p < 0.05).

566 **S1 Video. Primary skeletal muscle contraction in the absence of BTS.** Scale bar: 50  $\mu\text{m}$

567 **S2 Video. Primary skeletal muscle contraction in the presence of 10  $\mu\text{M}$  BTS.** Scale bar: 50  $\mu\text{m}$

568 **S3 Video. Calcium dynamics of primary skeletal muscles in the absence of BTS.** Scale bar: 100  $\mu\text{m}$

569 **S4 Video. Calcium dynamics of primary skeletal muscles in the presence of 10  $\mu\text{M}$  BTS.** Scale bar: 100  $\mu\text{m}$

570 **S1 Appendix. Supplementary methods and results**

571 **S1 Dataset.**

A

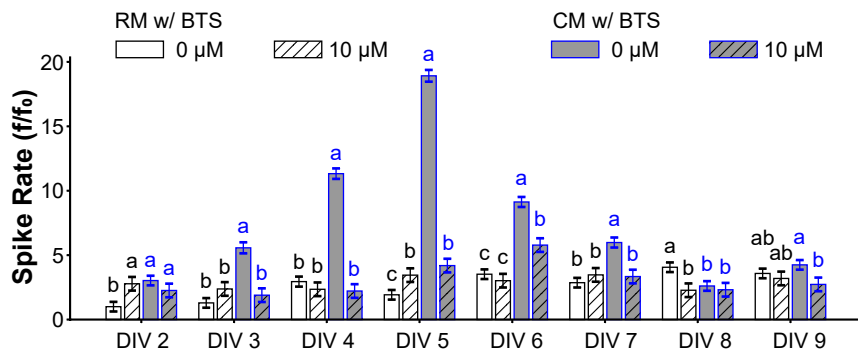

B

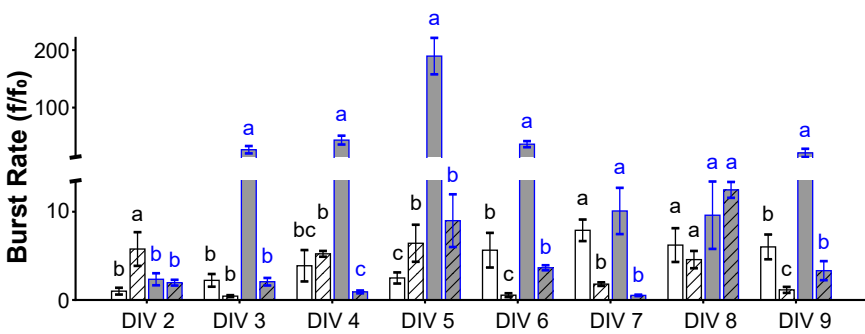

C

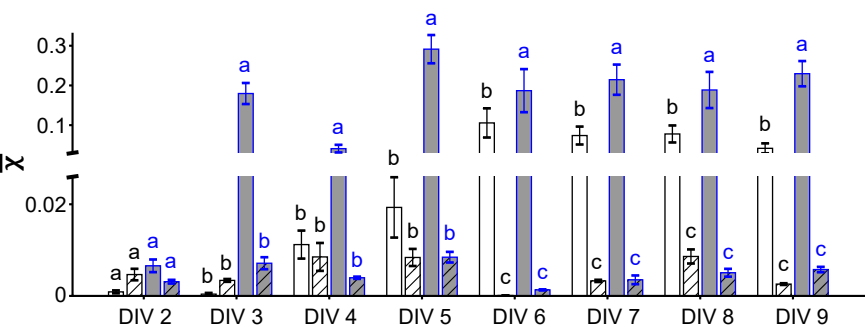

D

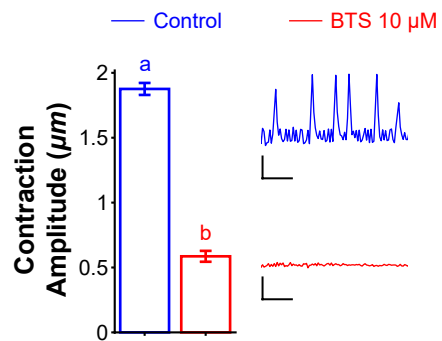

E

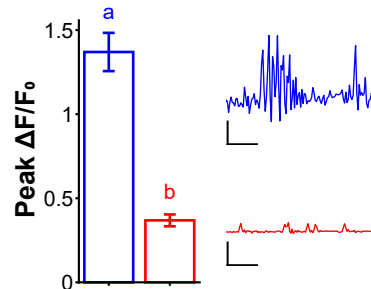

F

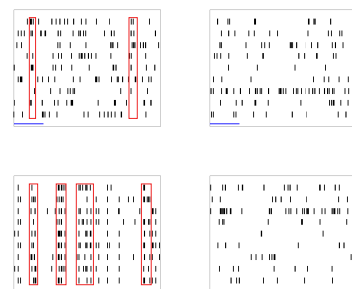

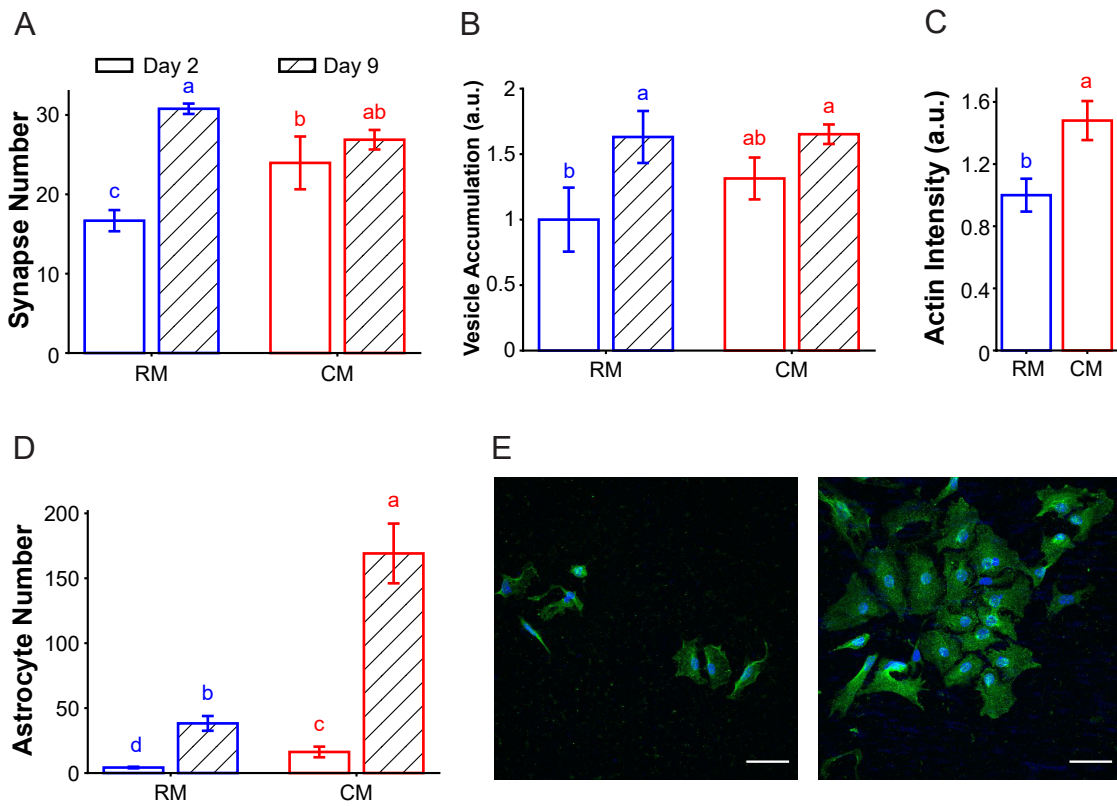

A

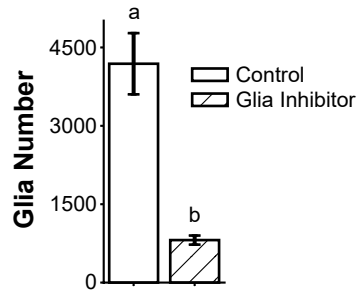

B

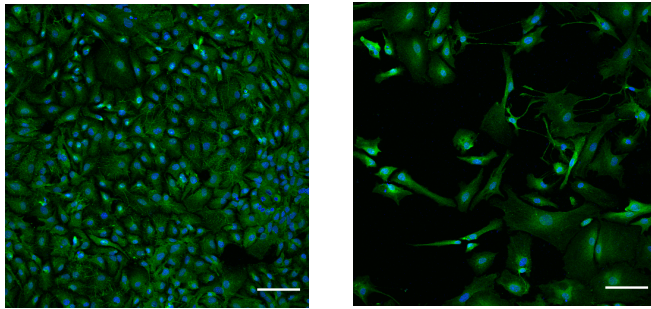

C

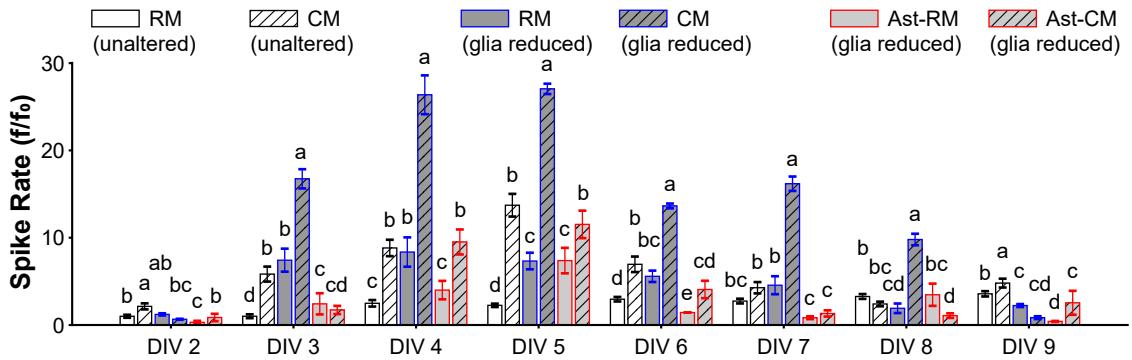

Source: http://biorxiv.org/content/10.1101/2022.04.12.487995v1.full.pdf
